# Supplementary material for: Systematic centricity control using a chiral template: novel noncentrosymmetric polar niobium oxyfluorides and tantalum fluorides directed by chiral histidinium cations, [(l-hisH2)NbOF5], [(d-hisH2)NbOF5], [(l-hisH2)TaF7], and [(d-hisH2)TaF7]
Source: Royal Society of Chemistry journal article supplement (doi:10.1039/d1qi00634g), 2021-01-01
Supplement: d1qi00634g1.pdf [file d1qi00634g1.pdf]

## Electronic Supplementary Information (ESI) for

# Systematic centricity control using a chiral template: novel noncentrosymmetric polar niobium oxyfluorides and tantalum fluorides directed by chiral histidinium cations, [(L-hisH<sub>2</sub>)NbOF<sub>5</sub>], [(D-hisH<sub>2</sub>)NbOF<sub>5</sub>], [(L-hisH<sub>2</sub>)TaF<sub>7</sub>], and [(D-hisH<sub>2</sub>)TaF<sub>7</sub>]

HeeJung Choi and Kang Min Ok\*

Department of Chemistry, Sogang University, 35 Baekbeom-ro, Mapo-gu, Seoul 04107, Korea

\*E-mail: kmok@sogang.ac.kr

### Table of contents

| Sections           | Titles                                                                                                                                     | pages |
|--------------------|--------------------------------------------------------------------------------------------------------------------------------------------|-------|
| <b>Section S1.</b> | Materials and Methods                                                                                                                      | S2    |
| <b>Figure S1.</b>  | Experimental and calculated powder X-ray diffraction patterns of (a) <i>L-Nb</i> , (b) <i>D-Nb</i> , (c) <i>L-Ta</i> , and (d) <i>D-Ta</i> | S3    |
| <b>Table S1.</b>   | Crystallographic data for <i>L-Nb</i> , <i>D-Nb</i> , <i>L-Ta</i> , and <i>D-Ta</i>                                                        | S4    |
| <b>Table S2.</b>   | Selected bond distances (Å) for <i>L-Nb</i>                                                                                                | S5    |
| <b>Table S3.</b>   | Hydrogen bonds distances (Å) for <i>L-Nb</i>                                                                                               | S5    |
| <b>Table S4.</b>   | Selected bond distances (Å) for <i>D-Nb</i>                                                                                                | S6    |
| <b>Table S5.</b>   | Hydrogen bonds distances (Å) for <i>D-Nb</i>                                                                                               | S6    |
| <b>Table S6.</b>   | Selected bond distances (Å) for <i>L-Ta</i>                                                                                                | S7    |
| <b>Table S7.</b>   | Hydrogen bonds distances (Å) for <i>L-Ta</i>                                                                                               | S7    |
| <b>Table S8.</b>   | Selected bond distances (Å) for <i>D-Ta</i>                                                                                                | S8    |
| <b>Table S9.</b>   | Hydrogen bonds distances (Å) for <i>D-Ta</i>                                                                                               | S8    |
| <b>Figure S2.</b>  | SEM-EDX data for <i>L-Nb</i> , <i>D-Nb</i> , <i>L-Ta</i> , and <i>D-Ta</i>                                                                 | S9–10 |
| <b>Table S10.</b>  | EA data for <i>L-Nb</i> , <i>D-Nb</i> , <i>L-Ta</i> , and <i>D-Ta</i>                                                                      | S11   |
| <b>Figure S3.</b>  | IR spectra for <i>L-Nb</i> , <i>D-Nb</i> , <i>L-Ta</i> , and <i>D-Ta</i>                                                                   | S12   |
| <b>Figure S4.</b>  | UV-vis diffuse reflectance spectra for <i>L-Nb</i> , <i>D-Nb</i> , <i>L-Ta</i> , and <i>D-Ta</i>                                           | S13   |
| <b>Figure S5.</b>  | TGA diagrams for <i>L-Nb</i> , <i>D-Nb</i> , <i>L-Ta</i> , and <i>D-Ta</i>                                                                 | S14   |
| <b>Figure S6.</b>  | Band structures for (a) <i>L-Nb</i> , (b) <i>D-Nb</i> , (c) <i>L-Ta</i> , and (d) <i>D-Ta</i>                                              | S15   |
| <b>Figure S7.</b>  | Density of states for (a) <i>L-Nb</i> , (b) <i>D-Nb</i> , (c) <i>L-Ta</i> , and (d) <i>D-Ta</i>                                            | S16   |
|                    | Birefringence calculations                                                                                                                 | S16   |
| <b>References</b>  |                                                                                                                                            | S17   |

## Section S1. Materials and Methods

**Materials. Caution: HF solution is highly corrosive! Proper protective equipment is essential for safety.** Nb<sub>2</sub>O<sub>5</sub> (Junsei, 99.9%), Ta<sub>2</sub>O<sub>5</sub> (Alfa Aesar, 99%), HF (Sigma Aldrich, 48 wt% aq. solution), L-histidine (Alfa Aesar, >98%), and D-histidine (Alfa Aesar, 99%) were purchased and used without further purification.

**Syntheses of L-Nb, D-Nb, L-Ta, and D-Ta.** Crystals of the reported compounds were grown by a slow evaporation method. First, clear Nb<sub>2</sub>O<sub>5</sub>/HF and Ta<sub>2</sub>O<sub>5</sub>/HF solutions were prepared. Two 0.133 g (0.5 mmol) portions of Nb<sub>2</sub>O<sub>5</sub> and two 0.221 g (0.5 mmol) portions of Ta<sub>2</sub>O<sub>5</sub> were placed in the respective 18 mL Teflon-cups containing 0.5 mL of HF (48 wt%) solutions. After putting the Teflon cups into stainless steel autoclaves and closing, the reactors were heated to 100 °C for 72 h. After cooling to room temperature, two 0.155 g (1 mmol) portions of L-histidine and two 0.155 g (1 mmol) portions of D-histidine were added to Nb<sub>2</sub>O<sub>5</sub>/HF and Ta<sub>2</sub>O<sub>5</sub>/HF solutions. Clear block-shaped crystals of [(L-hisH<sub>2</sub>)NbOF<sub>5</sub>] (**L-Nb**), [(D-hisH<sub>2</sub>)NbOF<sub>5</sub>] (**D-Nb**), [(L-hisH<sub>2</sub>)TaF<sub>7</sub>] (**L-Ta**), and [(D-hisH<sub>2</sub>)TaF<sub>7</sub>] (**D-Ta**) were grown in 7 days in 94%, 97%, 91%, and 85% yields, respectively .

**Figure S1.** Experimental and calculated powder X-ray diffraction patterns of (a) *L-Nb*, (b) *D-Nb*, (c) *L-Ta*, and (d) *D-Ta*

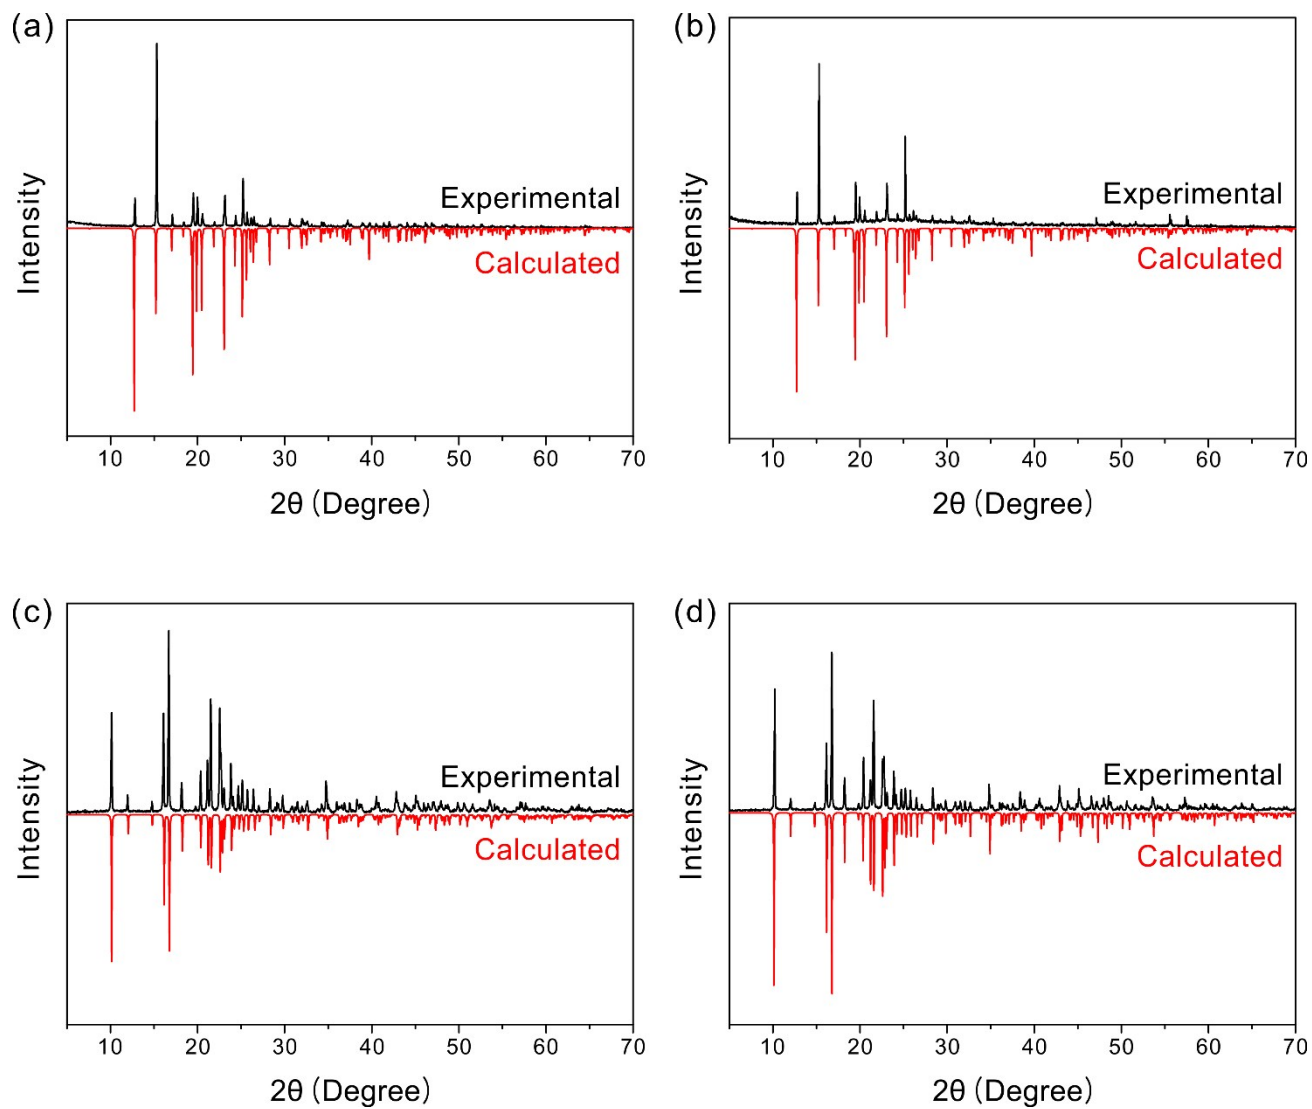

**Instrumentation.** Crystal structures of the reported compounds were determined by single crystal X-ray diffraction (SC-XRD). SC-XRD was conducted with a Bruker D8 QUEST diffractometer using graphite-monochromated Mo K $\alpha$  ( $\lambda = 0.71073 \text{ \AA}$ ) radiation and a PHOTON-II CPAD detector at 296 K at the Advanced Bio-Interface Core Research Facility, Sogang University. Colorless block-shaped crystals of **L-Nb** (0.168 mm  $\times$  0.252 mm  $\times$  0.316 mm), **D-Nb** (0.079 mm  $\times$  0.113 mm  $\times$  0.119 mm), **L-Ta** (0.105 mm  $\times$  0.195 mm  $\times$  0.389 mm), and **D-Ta** (0.065 mm  $\times$  0.078 mm  $\times$  0.171 mm) were selected to collect single crystal X-ray diffraction data. The collected data were integrated by the SAINT program.<sup>1</sup> Absorption correction was performed by the program SADABS.<sup>2</sup> The crystal structures were solved with SHELXS-2013<sup>3</sup> and refined with SHELXL-2013<sup>4</sup> implemented in WinGX-2014.<sup>5</sup>

**Table S1.** Crystallographic data for **L-Nb**, **D-Nb**, **L-Ta**, and **D-Ta**

|                                           | <b>L-Nb</b> | <b>D-Nb</b> | <b>L-Ta</b> | <b>D-Ta</b> |
|-------------------------------------------|-------------|-------------|-------------|-------------|
| fw                                        | 361.09      | 361.09      | 471.13      | 471.13      |
| space group                               | $P2_1$      | $P2_1$      | $P2_1$      | $P2_1$      |
| $a$ ( $\text{\AA}$ )                      | 5.4379(3)   | 5.4387(3)   | 7.8041(7)   | 7.8004(13)  |
| $b$ ( $\text{\AA}$ )                      | 8.6707(4)   | 8.6700(4)   | 8.2249(8)   | 8.2153(13)  |
| $c$ ( $\text{\AA}$ )                      | 11.7924(6)  | 11.7930(6)  | 9.2616(9)   | 9.2627(14)  |
| $\alpha$ ( $^\circ$ )                     | 90          | 90          | 90          | 90          |
| $\beta$ ( $^\circ$ )                      | 99.2698(14) | 99.276(2)   | 109.939(2)  | 109.890(4)  |
| $\gamma$ ( $^\circ$ )                     | 90          | 90          | 90          | 90          |
| $V$ ( $\text{\AA}^3$ )                    | 548.76(5)   | 548.81(5)   | 558.85(9)   | 558.17(15)  |
| $Z$                                       | 2           | 2           | 2           | 2           |
| $T$ (K)                                   | 296         | 296         | 100         | 100         |
| $\lambda$ ( $\text{\AA}$ )                | 0.71073     | 0.71073     | 0.71073     | 0.71073     |
| $\rho_{\text{calcd}}$ ( $\text{g/cm}^3$ ) | 2.185       | 2.185       | 2.800       | 2.803       |
| $R(F_o)^a$                                | 0.0157      | 0.0244      | 0.0129      | 0.0133      |
| $R_w(F_o^2)^b$                            | 0.0398      | 0.0449      | 0.0332      | 0.0312      |
| Flack $x$                                 | 0.008(7)    | 0.046(15)   | 0.048(11)   | -0.008(6)   |

$$^a R(F) = \sum ||F_o| - |F_c|| / \sum |F_o|.$$

$$^b R_w(F_o^2) = [\sum w(F_o^2 - F_c^2)^2 / \sum w(F_o^2)^2]^{1/2}.$$

**Table S2.** Selected bond distances (Å) for *L-Nb*

|            |            |            |          |            |          |
|------------|------------|------------|----------|------------|----------|
| Nb(1)-O(3) | 1.787(2)   | C(2)-O(2)  | 1.205(3) | C(6)-N(2)  | 1.316(4) |
| Nb(1)-F(1) | 1.8973(16) | C(2)-O(1)  | 1.324(4) | C(6)-H(6)  | 0.9300   |
| Nb(1)-F(2) | 1.911(2)   | C(3)-C(4)  | 1.503(4) | N(1)-H(1A) | 0.8900   |
| Nb(1)-F(3) | 1.9447(19) | C(3)-H(3A) | 0.9700   | N(1)-H(1B) | 0.8900   |
| Nb(1)-F(4) | 1.9613(19) | C(3)-H(3B) | 0.9700   | N(1)-H(1C) | 0.8900   |
| Nb(1)-F(5) | 2.0687(19) | C(4)-C(5)  | 1.343(4) | N(2)-H(2N) | 0.8600   |
| C(1)-N(1)  | 1.488(4)   | C(4)-N(2)  | 1.373(4) | N(3)-H(3N) | 0.8600   |
| C(1)-C(2)  | 1.516(4)   | C(5)-N(3)  | 1.374(5) | O(1)-H(1O) | 0.8200   |
| C(1)-C(3)  | 1.540(3)   | C(5)-H(5)  | 0.9300   |            |          |
| C(1)-H(1)  | 0.9800     | C(6)-N(3)  | 1.314(6) |            |          |

**Table S3.** Hydrogen bonds distances (Å) for *L-Nb*

| D-H...A             | d(D...A) | D-H...A             | d(D...A) |
|---------------------|----------|---------------------|----------|
| N(1)-H(1A)...O(3)#1 | 2.854(4) | N(2)-H(2N)...F(5)#2 | 2.718(4) |
| N(1)-H(1B)...F(3)#2 | 2.756(3) | N(3)-H(3N)...F(5)#4 | 2.687(3) |
| N(1)-H(1C)...F(4)#3 | 2.755(3) | O(1)-H(1O)...O(3)   | 2.599(4) |

Symmetry transformations used to generate equivalent atoms:

#1 -x+1,y-1/2,-z+2 #2 x+1,y-1,z #3 x,y-1,z #4 -x,y-1/2,-z+1

**Table S4.** Selected bond distances (Å) for *D-Nb*

|            |          |            |          |            |          |
|------------|----------|------------|----------|------------|----------|
| Nb(1)-O(3) | 1.787(3) | C(2)-O(2)  | 1.203(5) | C(6)-N(2)  | 1.321(6) |
| Nb(1)-F(1) | 1.893(2) | C(2)-O(1)  | 1.332(5) | C(6)-H(6)  | 0.9300   |
| Nb(1)-F(2) | 1.909(3) | C(3)-C(4)  | 1.500(5) | N(1)-H(1A) | 0.8900   |
| Nb(1)-F(3) | 1.942(3) | C(3)-H(3A) | 0.9700   | N(1)-H(1B) | 0.8900   |
| Nb(1)-F(4) | 1.958(3) | C(3)-H(3B) | 0.9700   | N(1)-H(1C) | 0.8900   |
| Nb(1)-F(5) | 2.065(3) | C(4)-C(5)  | 1.339(6) | N(2)-H(2N) | 0.8600   |
| C(1)-N(1)  | 1.489(5) | C(4)-N(2)  | 1.377(6) | N(3)-H(3N) | 0.8600   |
| C(1)-C(2)  | 1.510(5) | C(5)-N(3)  | 1.374(6) | O(1)-H(1O) | 0.8200   |
| C(1)-C(3)  | 1.539(5) | C(5)-H(5)  | 0.9300   |            |          |
| C(1)-H(1)  | 0.9800   | C(6)-N(3)  | 1.311(8) |            |          |

**Table S5.** Hydrogen bonds distances (Å) for *D-Nb*

| D-H...A             | d(D...A) | D-H...A             | d(D...A) |
|---------------------|----------|---------------------|----------|
| N(1)-H(1A)...O(3)#1 | 2.857(5) | N(2)-H(2N)...F(5)#3 | 2.721(5) |
| N(1)-H(1B)...F(4)#2 | 2.754(5) | N(3)-H(3N)...F(5)#4 | 2.689(5) |
| N(1)-H(1C)...F(3)#3 | 2.760(5) | O(1)-H(1O)...O(3)   | 2.601(5) |

Symmetry transformations used to generate equivalent atoms:

#1 -x+1,y+1/2,-z #2 x,y+1,z #3 x-1,y+1,z #4 -x+2,y+1/2,-z+1

**Table S6.** Selected bond distances (Å) for *L-Ta*

|            |          |            |          |            |          |
|------------|----------|------------|----------|------------|----------|
| Ta(1)-F(2) | 1.907(3) | C(1)-H(1)  | 1.0000   | C(6)-N(3)  | 1.325(6) |
| Ta(1)-F(4) | 1.937(3) | C(2)-O(2)  | 1.208(6) | C(6)-N(2)  | 1.333(6) |
| Ta(1)-F(3) | 1.944(5) | C(2)-O(1)  | 1.318(6) | C(6)-H(6)  | 0.9500   |
| Ta(1)-F(7) | 1.955(4) | C(3)-C(4)  | 1.480(6) | N(1)-H(1A) | 0.9100   |
| Ta(1)-F(6) | 1.971(3) | C(3)-H(3A) | 0.9900   | N(1)-H(1B) | 0.9100   |
| Ta(1)-F(5) | 1.974(5) | C(3)-H(3B) | 0.9900   | N(1)-H(1C) | 0.9100   |
| Ta(1)-F(1) | 1.985(4) | C(4)-C(5)  | 1.356(7) | N(2)-H(2N) | 0.8800   |
| C(1)-N(1)  | 1.494(5) | C(4)-N(2)  | 1.383(6) | N(3)-H(3N) | 0.8800   |
| C(1)-C(2)  | 1.518(6) | C(5)-N(3)  | 1.369(6) | O(1)-H(1O) | 0.8400   |
| C(1)-C(3)  | 1.556(7) | C(5)-H(5)  | 0.9500   |            |          |

**Table S7.** Hydrogen bonds distances (Å) for *L-Ta*

| D-H...A             | d(D...A) | D-H...A             | d(D...A) |
|---------------------|----------|---------------------|----------|
| N(1)-H(1A)...F(1)#4 | 2.945(9) | N(1)-H(1C)...F(4)#1 | 2.881(4) |
| N(1)-H(1A)...F(5)#4 | 2.853(9) | N(2)-H(2N)...F(6)#1 | 2.761(5) |
| N(1)-H(1B)...F(6)#5 | 3.099(4) | N(3)-H(3N)...F(4)#2 | 2.969(5) |
| N(1)-H(1B)...O(2)   | 2.698(5) | N(3)-H(3N)...F(5)#3 | 2.824(6) |
| N(1)-H(1C)...F(3)#6 | 2.795(8) | O(1)-H(1O)...F(1)   | 2.573(5) |

Symmetry transformations used to generate equivalent atoms:

#1  $x+1, y, z+1$  #2  $x+1, y, z$  #3  $-x+1, y-1/2, -z$  #4  $-x+1, y-1/2, -z+1$  #5  $x, y, z+1$  #6  $-x+1, y+1/2, -z+1$

**Table S8.** Selected bond distances (Å) for *D-Ta*

|            |          |            |          |            |          |
|------------|----------|------------|----------|------------|----------|
| Ta(1)-F(2) | 1.913(3) | C(1)-H(1)  | 1.0000   | C(6)-N(3)  | 1.329(6) |
| Ta(1)-F(4) | 1.944(2) | C(2)-O(2)  | 1.218(5) | C(6)-N(2)  | 1.332(6) |
| Ta(1)-F(3) | 1.952(4) | C(2)-O(1)  | 1.309(5) | C(6)-H(6)  | 0.9500   |
| Ta(1)-F(7) | 1.958(3) | C(3)-C(4)  | 1.481(6) | N(1)-H(1A) | 0.9100   |
| Ta(1)-F(5) | 1.968(5) | C(3)-H(3A) | 0.9900   | N(1)-H(1B) | 0.9100   |
| Ta(1)-F(6) | 1.974(2) | C(3)-H(3B) | 0.9900   | N(1)-H(1C) | 0.9100   |
| Ta(1)-F(1) | 1.983(3) | C(4)-C(5)  | 1.362(6) | N(2)-H(2N) | 0.8800   |
| C(1)-N(1)  | 1.487(5) | C(4)-N(2)  | 1.381(6) | N(3)-H(3N) | 0.8800   |
| C(1)-C(2)  | 1.519(6) | C(5)-N(3)  | 1.373(6) | O(1)-H(1O) | 0.8400   |
| C(1)-C(3)  | 1.558(6) | C(5)-H(5)  | 0.9500   |            |          |

**Table S9.** Hydrogen bonds distances (Å) for *D-Ta*

| D-H...A             | d(D...A) | D-H...A             | d(D...A) |
|---------------------|----------|---------------------|----------|
| N(1)-H(1A)...F(1)#1 | 2.951(8) | N(1)-H(1C)...F(6)#4 | 3.084(4) |
| N(1)-H(1A)...F(5)#1 | 2.857(8) | N(2)-H(2N)...F(6)#3 | 2.763(5) |
| N(1)-H(1B)...F(3)#2 | 2.781(7) | N(3)-H(3N)...F(4)#5 | 2.950(5) |
| N(1)-H(1B)...F(4)#3 | 2.889(4) | N(3)-H(3N)...F(5)#6 | 2.830(6) |
| N(1)-H(1C)...O(2)   | 2.703(4) | O(1)-H(1O)...F(1)   | 2.574(5) |

Symmetry transformations used to generate equivalent atoms:

#1 -x+1,y+1/2,-z+1 #2 -x+1,y-1/2,-z+1 #3 x-1,y,z-1 #4 x,y,z-1 #5 x-1,y,z #6 -x+1,y+1/2,-z+2



**Energy dispersive analysis by X-ray (EDX).** EDX was performed using a Horiba Energy EX-250 instrument equipped on a Hitachi S-3400N scanning electron microscope. Crystals of the reported compounds were attached on a carbon tape and coated using Pt before mounting. The EDX data were consistent with the calculated atomic ratio from the single crystal X-ray diffraction (Figure S5).

**Figure S2.** SEM-EDX data for *L-Nb*, *D-Nb*, *L-Ta*, and *D-Ta*

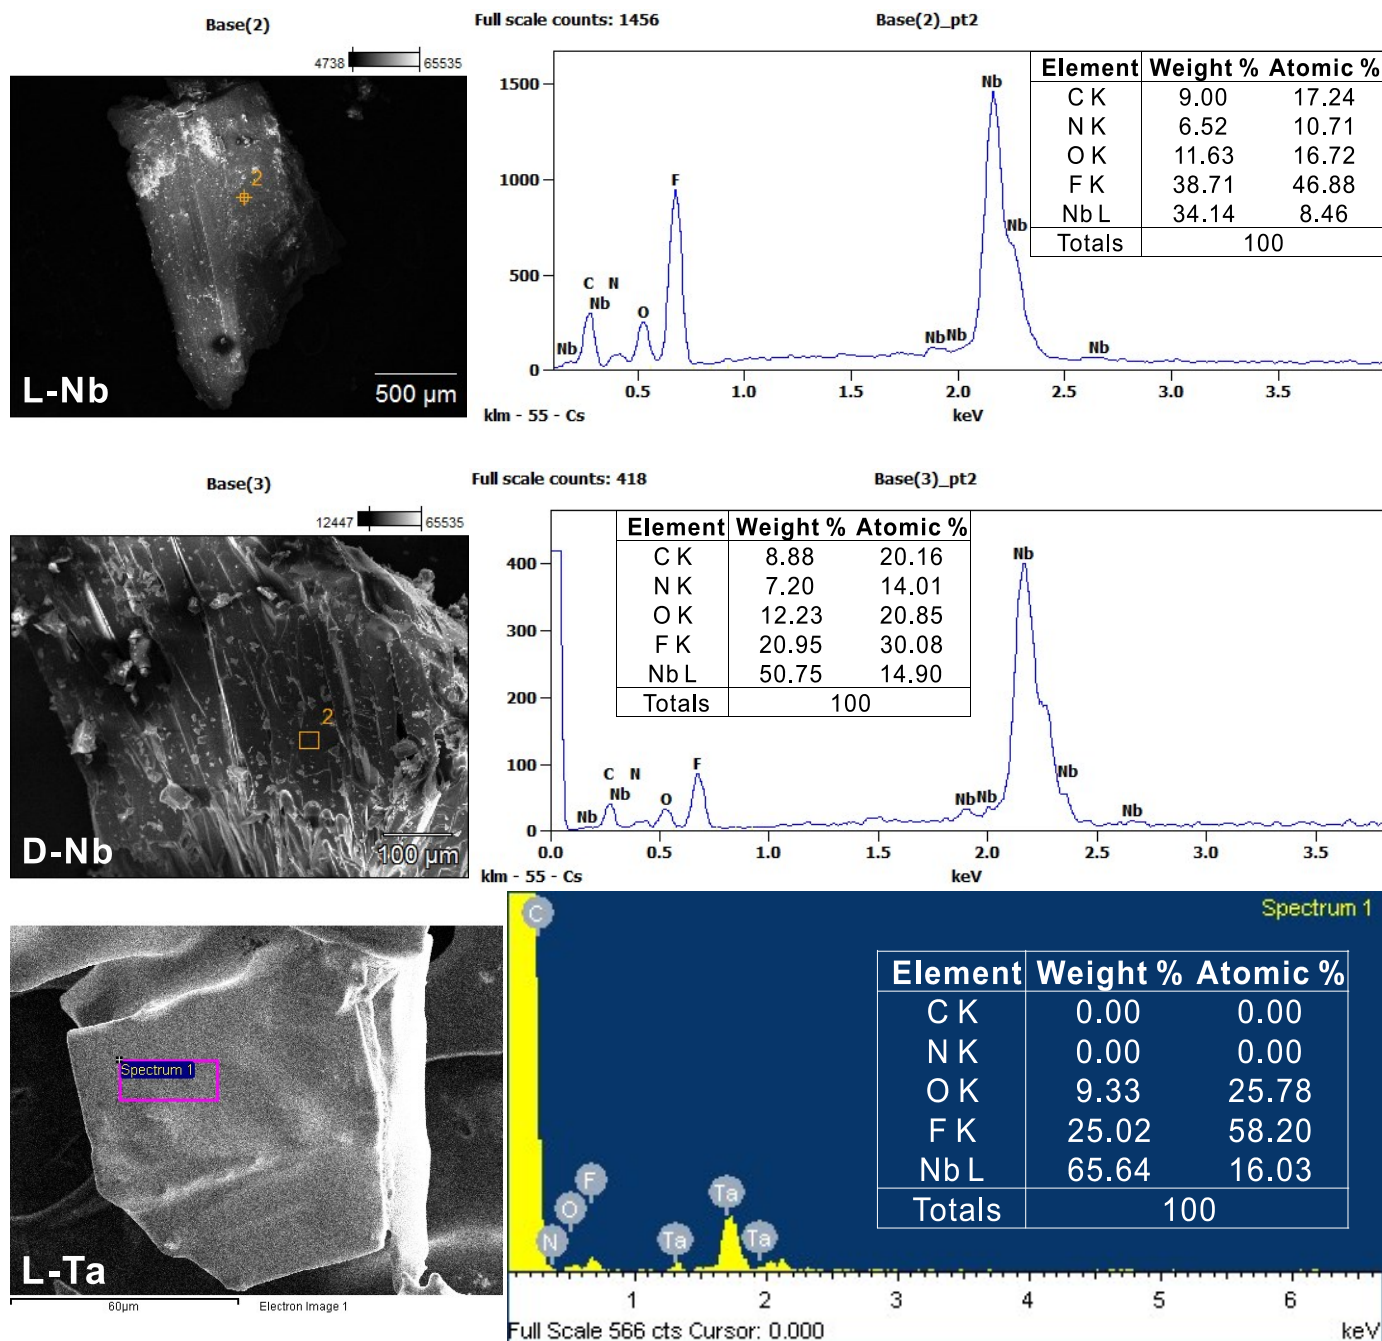

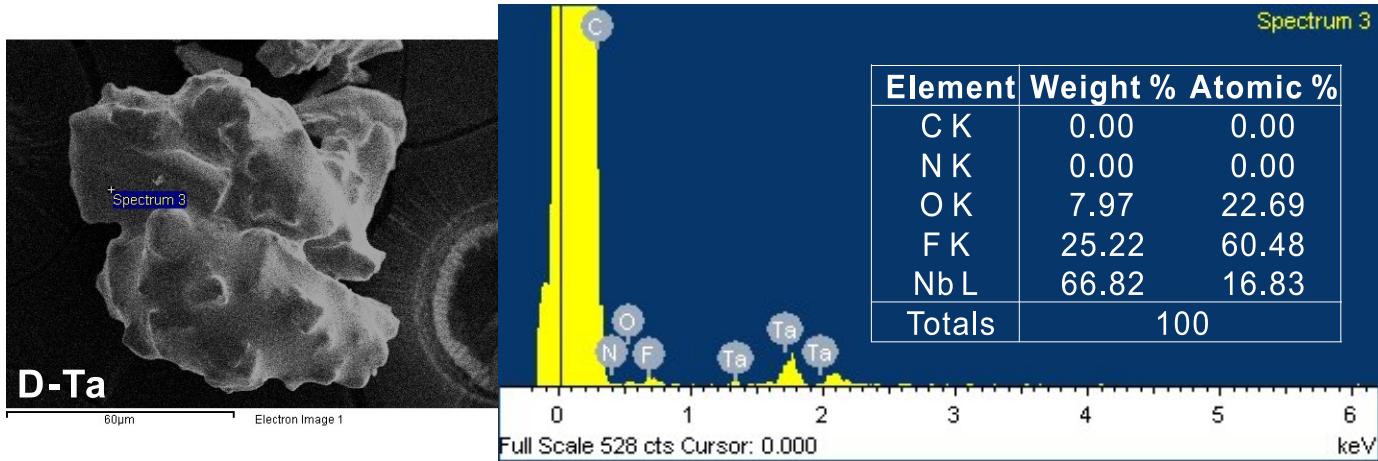

**Elemental Analysis (EA).** EA was carried out by a Thermo Finnigan Flash EA1112 on Sn capsule.

**Table S10.** EA data for *L-Nb*, *D-Nb*, *L-Ta*, and *D-Ta*

| Element | <i>L-Nb</i> | <i>D-Nb</i> | <i>L-Ta</i> | <i>D-Ta</i> |
|---------|-------------|-------------|-------------|-------------|
| N       | 11.5424     | 11.5962     | 8.8754      | 8.8918      |
| C       | 19.8598     | 19.9143     | 15.4809     | 15.2922     |
| H       | 3.2766      | 3.0023      | 2.4891      | 2.1186      |
| Totals  | 34.6789     | 34.5128     | 26.8454     | 26.3027     |

**Infrared (IR) spectroscopy.** FT-IR spectra were measured using a Thermo Scientific Nicolet iS50 FT-IR spectrometer with an attenuated total reflection (ATR) accessory in the range of 400–4000  $\text{cm}^{-1}$ .

**Figure S3.** IR spectra for *L-Nb*, *D-Nb*, *L-Ta*, and *D-Ta*

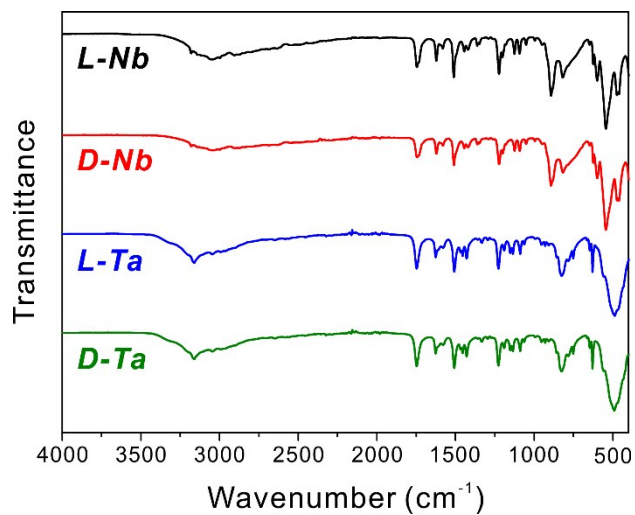

**Ultraviolet-visible (UV-vis) diffuse-reflectance spectroscopy.** UV-vis diffuse-reflectance spectra were obtained in the range of 200–900 nm by using a Lambda 1050 spectrophotometer. The band gap energy was calculated by the Kubelka-Munk function.

**Figure S4.** UV-vis diffuse reflectance spectra for *L-Nb*, *D-Nb*, *L-Ta*, and *D-Ta*

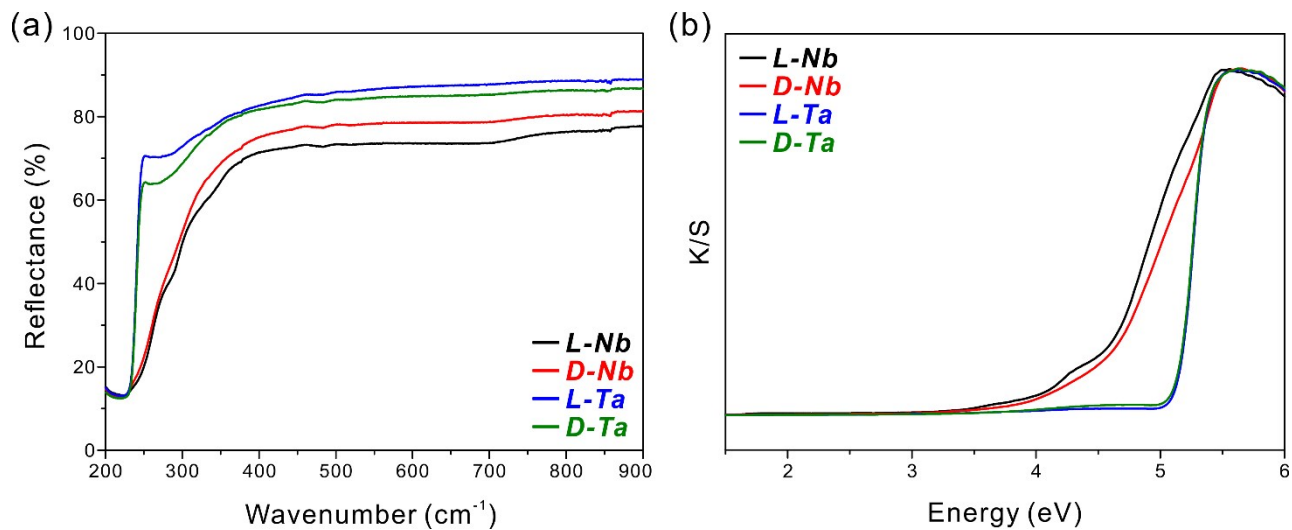

**Thermogravimetric analyses (TGA).** TGA was conducted by using a SCINCO TGA-N 1000 thermal analyzer. The ground samples were loaded in alumina crucibles and heated from room temperature to 900 °C at a rate of 10 °C min<sup>-1</sup> under flowing air.

**Figure S5.** TGA diagrams for *L-Nb*, *D-Nb*, *L-Ta*, and *D-Ta*

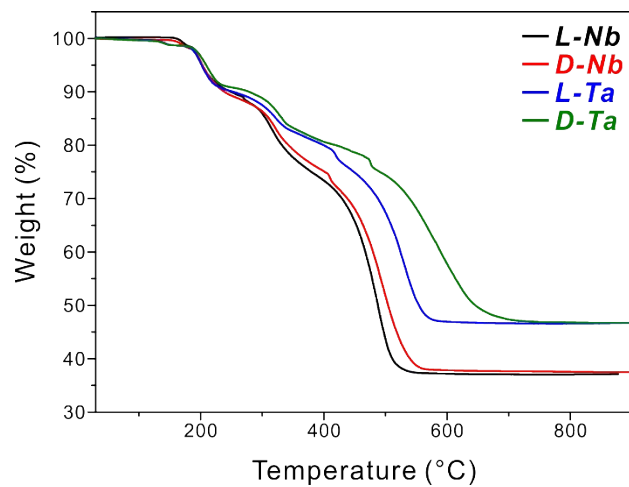

**Density functional theory (DFT) calculations.** DFT calculations were conducted to investigate the electronic structure in the Quantum Espresso package.<sup>6</sup> The crystal structure models obtained through SC-XRD measurement were utilized for structural optimization. The electronic structures of the compounds were calculated using the ultrasoft pseudopotentials<sup>7</sup> with nonlinear core correction. Also, the Perdew–Burke–Ernzerhof (PBE)<sup>8</sup> functional and the scalar relativistic effect were applied for all constituent elements (C, H, N, O, Nb, and Ta) from the Quantum Espresso website. For **Nb** compounds, the wave function and the charge energy of the cutoff energies for the self-consistent function (SCF) calculations were set to 49.146 and 326.261 Ry, respectively. While, the kinetic energy and charge density cutoff were set to 51.330 and 530.066 Ry, respectively for **Ta** compounds. The SCF convergence criterion was set to under  $10^{-6}$  Ry and all DFT calculations were computed in  $6 \times 4 \times 3$  for **Nb** compounds and  $4 \times 4 \times 3$  for **Ta** compounds k-point grids of Brillouin zone.

**Figure S6.** Band structures for (a) **L-Nb**, (b) **D-Nb**, (c) **L-Ta**, and (d) **D-Ta**. Arrows represent the optical transition from the valence band maximum to the conduction band minimum.

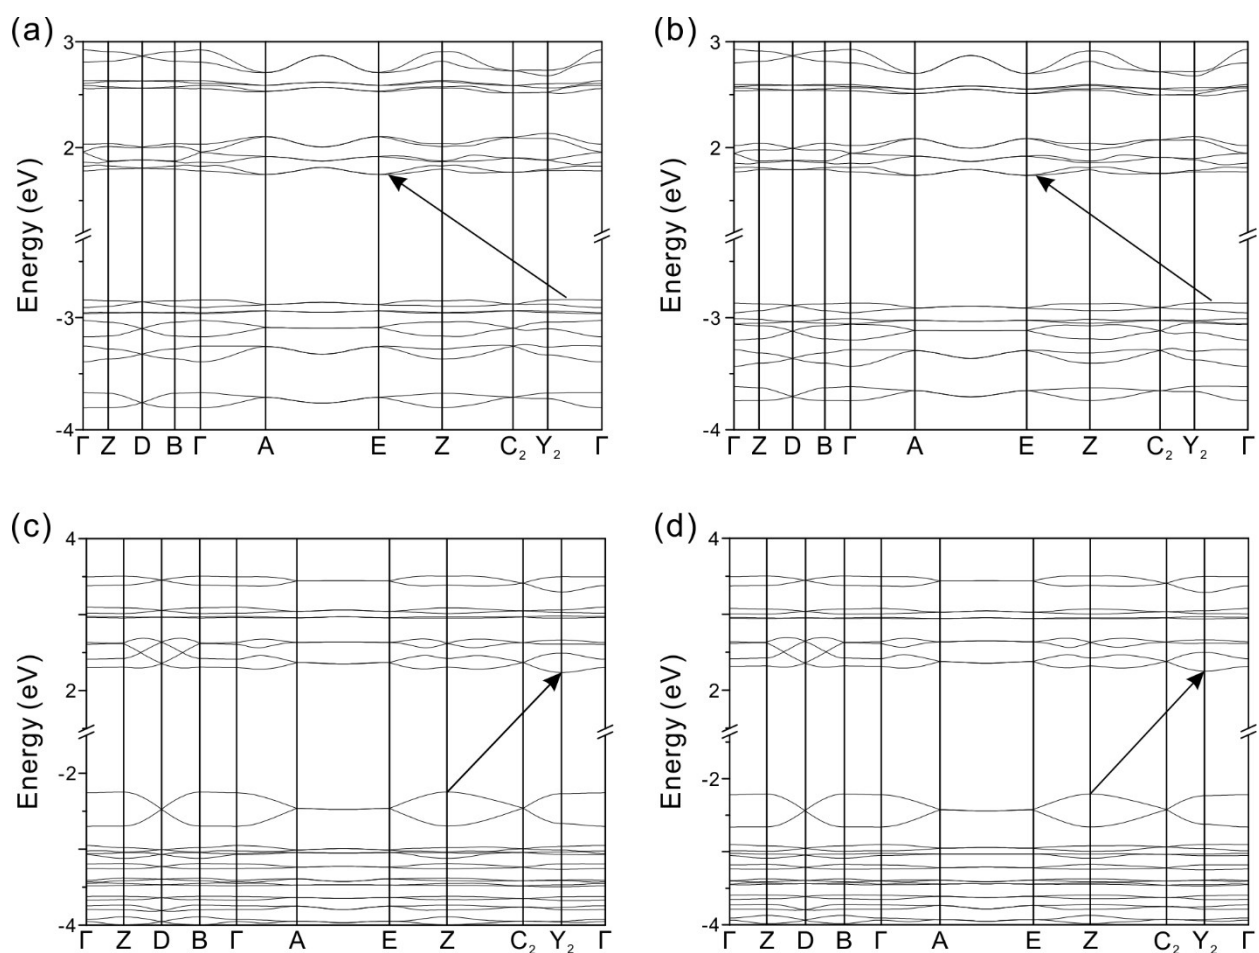

**Figure S7.** Density of states for (a) *L-Nb*, (b) *D-Nb*, (c) *L-Ta*, and (d) *D-Ta*.

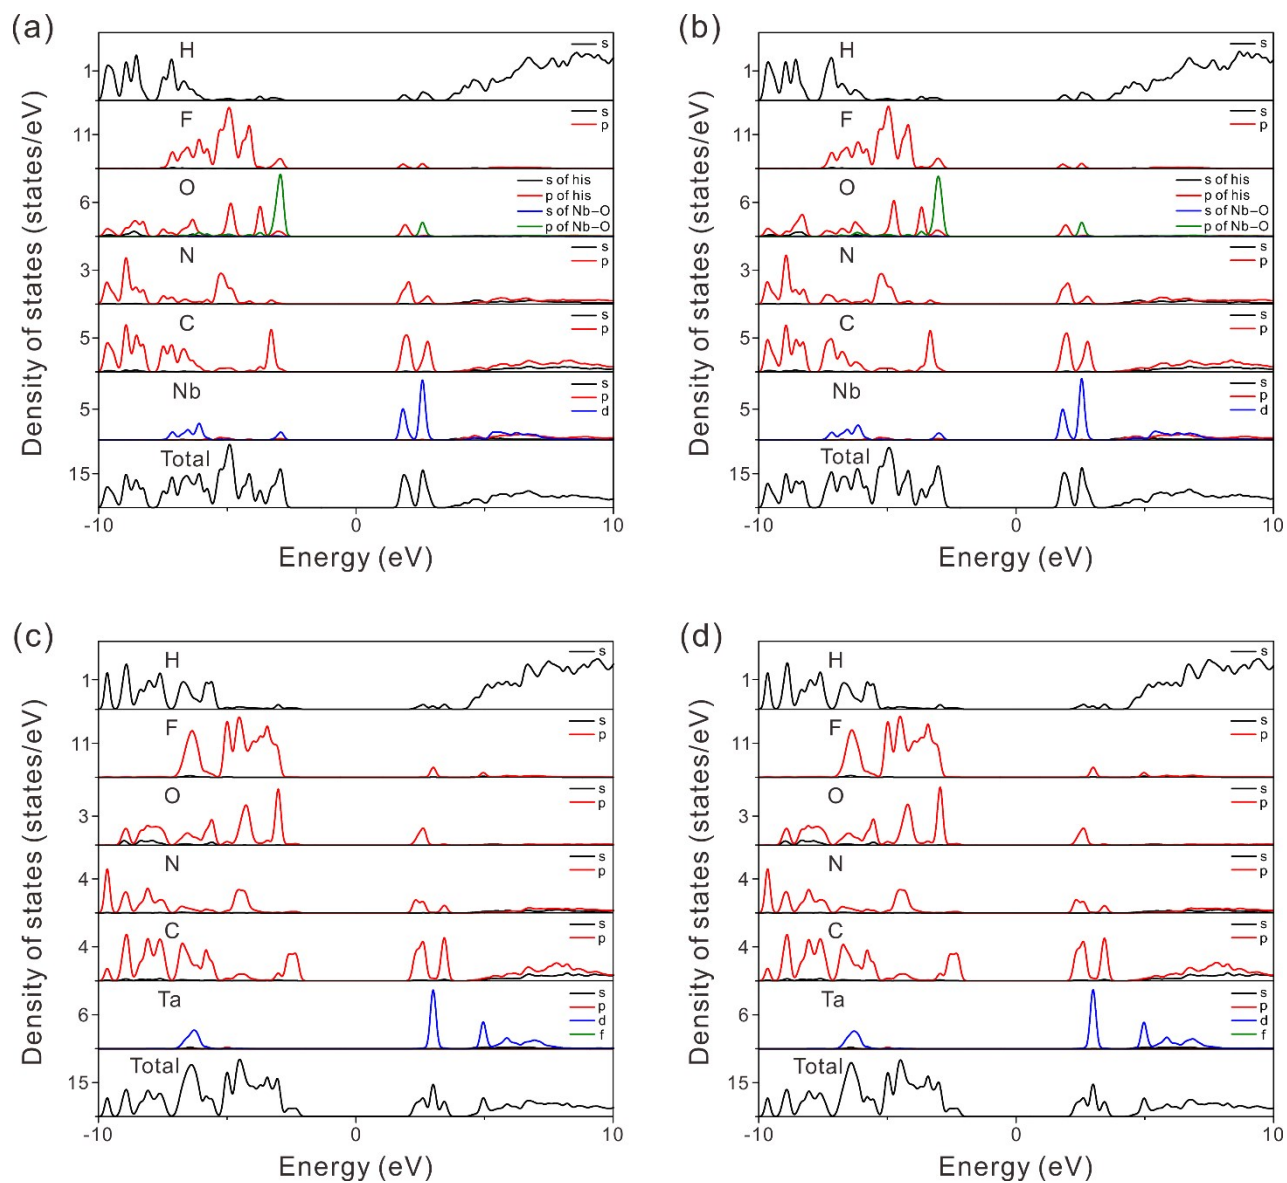

**Birefringence calculations.** We used a norm-conserving pseudopotential method to calculate the birefringence. The calculations were performed through YAMBO.<sup>9-12</sup> By doing so, the calculated birefringence values of *Nb* and *Ta* compounds are approximately 0.0365 and 0.049, respectively.



## References

1. SAINT 4.05; Siemens Energy and Automation Inc. Madison, WI **1996**.
2. SADABS; Siemens Industrial Automation Inc. Madison, WI **1996**.
3. Sheldrick, G., SHELXS-2013/1, program for the solution of crystal structures. Germany, University of Göttingen **2013**.
4. Sheldrick, G., Crystal structure refinement with SHELXL. *Acta Crystallogr. Sect. C* **2015**, *71*, 3-8.
5. Farrugia, L., WinGX and ORTEP for Windows: an update. *J. Appl. Crystallogr.* **2012**, *45*, 849-854.
6. Giannozzi, P.; Baroni, S.; Bonini, N.; Calandra, M.; Car, R.; Cavazzoni, C.; Ceresoli, D.; Chiarotti, G. L.; Cococcioni, M.; Dabo, I., QUANTUM ESPRESSO: a modular and open-source software project for quantum simulations of materials. *J. Phys.: Condense. Mat.* **2009**, *21*, 395502.
7. Vanderbilt, D., Soft self-consistent pseudopotentials in a generalized eigenvalue formalism. *Phys. Rev. B* **1990**, *41*, 7892.
8. Perdew, J. P.; Burke, K.; Ernzerhof, M., Generalized gradient approximation made simple. *Phys. Rev. Lett.* **1996**, *77*, 3865.
9. G. Adragna, R. Del Sole and A. Marini, *Physical Review B*, 2003, **68**, 165108.
10. A. Marini, R. Del Sole and A. Rubio, *Phys. Rev. Lett.*, 2003, **91**, 256402.
11. M. Rohlfing and S. G. Louie, *Phys. Rev. Lett.*, 1998, **81**, 2312.
12. F. Sottile, V. Olevano and L. Reining, *Phys. Rev. Lett.*, 2003, **91**, 056402.
